# Supplementary material
Source: publisher figshare collection journal article supplement (https://springernature.figshare.com/ndownloader/files/12477515)
Supplement: Supplementary file 1 [file 12477515]

## Sheet: Included
Additional file 5. Narrative synthesis of included studies, including study metadata.
Citation	Authors	Title	Year	Journal/Book/ Publisher	Volume	Pages	Language	Study identification (for articles with multiple studies)	Country	State/Province	Region/site(s)	Lat.	Long.	Plotted lat.	Plotted long.	Altitude (m) (blue figures based on Google Earth)	Mean annual temperature (C) (blue figures based on Worldclim)	Mean annual precipitation (mm) (blue figures based on Worldclim)	Road no. or name	Road type LARGE: Large / heavily used LESS: Less heavily used UNPAVED: Small, unpaved	Road age (time elapsed after construction/reconstruction of road or roadside)	Traffic	Road maintenance	Roadside width, aspect, slope	Soil type	Nutrient status	Shading	Adjacent land use	Pre-treatment roadside management	Roadside manager	Roadside vegetation before (or during) treatment	Study design (BA/CI/BACI)	Interventions relevant to this review	Goal of intervention under study	Additional interventions (not compared)	Spatial setup of interventions	Spatial setup of sampling	No. of intervention seasons studied	Species studied (relevant to this review)	Effects of interventions	Remarks
Adams & Blaser (1979)	Adams P P; Blaser R E	Improving vegetation and mowing management in highway corridors	1979	Virginia Polytechnic Institute and State University	VHTRC 79-R63		English	2.3.2	USA	Virginia	Lexington	37.8 N	79.4 W	37.8	-79.4	375	12.4292	1030	I-64	LARGE											Crownvetch (Coronilla varia) and tall fescue Festuca arundinacea	BACI	Mowing (1, 2 or 3/year, early/late first mowing, 10/20 cm height, or no mowing)	Maintenance of leguminous cover (Coronilla varia)		7.5*18 m plots in highway medians, 6 replicates of each treatment		2 (1977-78)	Coronilla varia	No statistical analysis of data
Auestad et al. (2010)	Auestad I; Rydgren K; Jongejans E; de Kroon H	Pimpinella saxifraga is maintained in road verges by mosaic management	2010	Biological Conservation	143	899-907	English		Norway	Sogn og Fjordane	Lærdal	61.07 N	7.53-7.82 E	61.07	7.68	35-420	5.9	500		LESS	40 years or more			Width 3-5 m, facing SW-SE	Eroded, glacifluvial deposits				Mowing 1-2 times/year without hay removal since 1990			CI	Mowing (1/year with hay removal, 2/year w/wo hay removal, or no mowing)	Conservation of a declining herb species (Pimpinella saxifraga)		15-16 m2 blocks with one 0.25 m2 plot for each of 4 treatments; 6 replicates at each of 3 sites	Individual P. saxifraga specimens (every specimen found in the plots)	4 (2003-06)	Pimpinella saxifraga	Significance of reported population changes unclear	Three pasture sites also studied
Auestad et al. (2011)	Auestad I; Rydgren K; Austad I	Road verges: potential refuges for declining grassland species despite remnant vegetation dynamics	2011	Annales Botanici Fennici	48	289-303	English		Norway	Sogn og Fjordane	Lærdal	61.07 N	7.53-7.82 E	61.07	7.68	35-420	5.9	500		LESS	40 years or more (Auestad et al. 2010)			Width 3-5 m, facing SW-SE	Eroded, glacifluvial deposits (Auestad et al. 2010)				Mowing 1-2 times/year without hay removal since 1990 (Auestad et al. 2010)			BACI	Mowing (1/year with hay removal, 2/year w/wo hay removal, or no mowing)	Conservation of declining grassland species		15-16 m2 blocks with one 0.25 m2 plot for each of 4 treatments; 6 replicates at each of 3 sites	12.5 * 12.5 cm subplots (16 per plot)	4 (2003-06)	Vascular plants	All treatments (including no mowing) increased the species richness of vascular plants. Not clear if effects of mowing treatments differed significantly from those of no mowing.
Bagavathiannan et al. (2010)	Bagavathiannan M V; Gulden R H; Begg G S; Van Acker R C	The demography of feral alfalfa (Medicago sativa L.) populations occurring in roadside habitats in Southern Manitoba, Canada: implications for novel trait confinement	2010	Environmental Science and Pollution Research	17	1448-1459	English		Canada	Manitoba	Hanover; MacDonald; Springfield	49.47-49.92 N	96.75-97.5 W	49.51	-96.87	250	2.2875	520		LESS, UNPAVED				Width about 3.5 m, varying slope (Table 1)				Various (Table 1)	Mowing 2 times/year	Municipalities		CI	Mowing (2/year vs. no mowing)	Investigation of alfalfa growth and reproduction		4 roadside sites in each of 3 municipalities, but extent of treatments not clear	Soil cores (3 per study plant)	2 (2006-07)	Medicago sativa	Mowing vs. no mowing: Medicago sativa, density in soil seedbank: NS
Barker & Prostak (2008)	Barker A V; Prostak R G	Herbicide alternatives research	2008	University of Massachusetts Transportation Center	SPRII03.23		English	Chapter 4.2.1	USA	Massachusetts	Deerfield	42.53 N	72.62 W	42.53	-72.62	115	7.90833	1139	I-91	LARGE									Herbicide use	Massachusetts Highway Department		CI	Burning (with hand-held torch until all vegetation was destroyed, vs. no burning)	Finding alternatives to herbicide treatments	Some of the burned plots sowed with Trifolium repens. Other plots treated with mulching, use of conventional and alternative herbicides (including corn gluten meal), or mulching + alternative herbicides.			2 (2005-06)	Vegetation as a whole (biomass)	Burning vs. no burning: Vegetation, biomass: NS
Barker & Prostak (2008)	Barker A V; Prostak R G	Herbicide alternatives research	2008	University of Massachusetts Transportation Center	SPRII03.23		English	Chapter 4.2.6	USA	Massachusetts	Deerfield	42.51 N	72.62 W	42.51	-72.62	90	7.90833	1139	I-91	LARGE				Slope 0-3%					Herbicide use	Massachusetts Highway Department		CI	Burning (with hand-held torch until all vegetation was destroyed, vs. no burning)	Finding alternatives to herbicide treatments	Some of the burned plots also treated with corn gluten meal. Other plots treated with herbicides and corn gluten meal.	1.2*3.6 m plots, 3 replicates of each treatment		1 (2005)	"Weeds" (vegetation as a whole?) (density)	No statistical analysis of burning vs. no burning
Barker & Prostak (2014)	Barker A V; Prostak R G	Management of vegetation by alternative practices in fields and roadsides	2014	International Journal of Agronomy	207828		English	Roadside research	USA	Massachusetts	Deerfield	42.51 N	72.62 W	42.51	-72.62	90	7.90833	1139	I-91	LARGE											Mainly tall fescue (Festuca arundinacea)	CI	Mowing (vs. no mowing)	Finding alternatives to herbicide treatments	Some of the plots also treated with herbicides	1.2*4.6 m plots, 3 replicates of each treatment at each of 2 sites	0.25 m2 subplot (1 per plot)	1 (2006)	Vegetation as a whole (biomass)	Mowing vs. no mowing: Vegetation, biomass: NS
Bele & Nilsen (2009)	Bele B; Nilsen S	Slått av næringsrik veikant - effekter av ulike skjøtselstiltak på Fosen, Sør-Trøndelag. Sluttrapport	2009	Bioforsk Report	4 / 171		Norwegian		Norway	Sør-Trøndelag	Lysøysundet, Bjugn	63.88 N	9.86 E	63.88	9.86	15	6.2	1035	Fylkesvei 87	LESS				Width at least 3 m, facing NW	Silty sand	Nutrient-rich (high P and K content)		Ley				BACI	Mowing (mainly 2/year, early/late, w/wo hay removal, or no mowing)	Control of tall and fast-growing weeds		2*5 m plots (or larger), 3 replicates of each treatment	1 m2 subplots (3 per plot)	5 (2004-2008)	Vascular plants; field and bottom layers as a whole (cover); vegetation as a whole (biomass)	Significance of published results unclear
Camp & Best (1993)	Camp M; Best L B	Bird abundance and species richness in roadsides adjacent to Iowa rowcrop fields	1993	Wildlife Society Bulletin	21	315-325	English		USA	Iowa	Story, Boone and Hardin counties	42.2 N	93.5 W	42.2	-93.5	320	8.29583	850		UNPAVED				Width 6-8 m				Cornfields or soybean fields		Story, Boone and Hardin counties	Mixture of native and exotic grasses, or predominantly Bromus inermis	CI	Burning (vs. no burning)	Restoration of native prairie vegetation		6-8*500 m roadside sections, 13 treated, 21 untreated	15 subplots per roadside	1 (1990 or 1991)	Vascular plants; vegetation as a whole	Burning vs. no burning: Graminoids (all), cover: — Bromus inermis, Poa pratensis, Spartina pectinata, Andropogon gerardi, Carex spp., Elymus canadensis, Agropyron repens and Phalaris arundinacea, cover: NS Forbs, cover: NS
Charvat et al. (2000)	Charvat I; Tallaksen J; White J; Agwa H; Raley M; Slack S; Hebberger J A; Gould E	Mycorrhizal/plant factors involved in roadside reclamation	2000	Minnesota Department of Transportation	MN/RC - 2000-30		English	Chapter 6.2	USA	Minnesota	St. Cloud	45.5 N	94.23 W	45.5	-94.23	325	6.175	708	Trunk Highway 15	LARGE	7 years			Relatively flat	Fine loamy sand				Seeding 8 years before sampling	Minnesota Department of Transportation	Mainly exotic grasses and forbs	CI	Mowing (vs. no mowing) x Burning (vs. no burning)	Restoration of native prairie vegetation		10*10 m plots, 5 replicates of each treatment	5*5 m subplot (1 per plot)	1 (treatments in 1998, vegetation sampling in 1999)	Vascular plants (native and exotic)	Treatment (mowing, burning, mowing + burning) vs. no treatment: Vegetation (native species), cover: NS Vegetation (exotic species), cover: NS	Data on individual species not published
Chaudron et al. (2016a)	Chaudron C; Chauvel B; Isselin-Nondedeu F	Effects of late mowing on plant species richness and seed rain in road verges and adjacent arable fields	2016	Agriculture, Ecosystems and Environment	232	218-226	English		France	Indre-et-Loire		47.11 N	1.13 E	47.11	1.13	135	11.1958	696						Width (of berm) 2 m	Cambisols			Wheat or barley fields		Local authority		CI	Mowing (early vs. late)			Observational study of 6 roadsides, 3 replicates of each treatment	2*0.5 m subplots (3 in the berm of each roadside); 2 seed traps at each subplot	4 (sampling in final season only)	Vascular plants (standing vegetation and seed rain)	Mowing, early vs. late: Standing vegetation, species richness: NS Seed rain, species richness: —
Chaudron et al. (2016b)	Chaudron C; Perronne R; Bonthoux S; Di Pietro F	Influence of management practices on plant assemblages of road–field boundaries in an agricultural landscape	2016	Applied Vegetation Science	19	644-654	English		France	Indre-et-Loire		47.11-47.19 N	0.88-1.15 E	47.15	1	110	11.3	761							Limestone-dominated or clayey			Wheat or barley fields, some forest		Local authority and farmers		CI	Mowing (≥ 2/year or 1/year early or late)			Observational study of 40 roadsides, 9-13 replicates per treatment	4*0.5 m subplots (3 in the berm of each roadside)	1	Vascular plants	Mowing ≥ 2/year vs. 1/year (early): Vascular plants, species richness: — Vascular plants, species evenness: NS Mowing ≥ 2/year vs. 1/year (late): Vascular plants, species richness: NS Vascular plants, species evenness: NS
Christiansen (1994)	Christiansen P A	Establishment of prairie species by overseeding into burned roadside vegetation	1994	Proceedings of the 14th Annual North American Prairie Conference		167-169	English		USA	Iowa	Linn County	41.98 N	91.41 W	41.98	-91.41	265	9.00833	908	Linn Ridge Road					Slope 5-9%	Downs silt loam, moderately eroded							CI	Burning (annually except one year, vs. no burning)	Establishment of prairie vegetation	Some of the plots seeded with grass and forb mixtures	5*20 m plots, 3 replicates of each treatment		4 (1991-94)	Andropogon gerardi, Sorghastrum nutans, Rudbeckia hirta, Heliopsis helianthoides, Ratibida pinnata	Burning increased the number of seedlings of sown prairie forbs compared to no burning (no statistical analysis of data).
Endels et al. (2007)	Endels P; Jacquemyn H; Brys R; Hermy M	Reinstatement of traditional mowing regimes counteracts population senescence in the rare perennial Primula vulgaris	2007	Applied Vegetation Science	10	351-360	English		Belgium		Brugge	51.18 N	3.35 E	51.18	3.35	15	10.1375	736						Width 2 m, facing W, slope ca 20%				Intensively managed grassland	Mowing abandoned in 1996		Grasses (mainly Arrhenatherum elatius, Agrostis capillaris, Festuca rubra, Holcus lanatus) and forbs (e.g. Ranunculus repens, R. acris, Lythrum salicaria etc.)	BACI	Mowing (1 or 2/year, with hay removal, or no mowing)	Restoration of vulnerable plant species		2.5*2 m plots, 9 replicates of each treatment	Individual P. vulgaris specimens (every specimen found in the plots)	4 (2000-03)	Primula vulgaris	Mowing 2/year vs. 1/year: Primula vulgaris, population growth rate (after 3 years): + Mowing vs. no mowing: Primula vulgaris, population growth rate (after 3 years): +
Forslund (2012)	Forslund I	Viltanpassad röjning längs skogsbilvägar som en foderskapande åtgärd för älgen	2012	SLU, Institutionen för vilt, fisk och miljö (Examensarbete i ämnet biologi)	2012:2		Swedish		Sweden	Norrbotten	Råneå	66.12-66.21 N	21.86-22.18 E	66.17	22.02	165	-0.120833	600-700		UNPAVED		Light		Width about 4 m	Mainly sand			Forest dominated by Scots pine (70%), wetlands (20%), lakes (10%)				CI	Shrub clearing + removal of adjacent trees (vs. shrub clearing only)	Improving availabity of moose forage along roadsides, thereby decreasing moose browsing in commercially managed forest		Observational study of roadsides with two different types of management	1*1 m subplots (1 per treatment every 100 m along studied roadsides)	1 (treatments in 2009 and/or 2010, vegetation sampling in 2011)	Vascular plants (13 selected species/genera)	Shrub clearing + tree removal vs. shrub clearing only: Picea abies, cover: + 12 other species (mainly woody plants), cover: NS
Fyns Amt (1995)	Fyns Amt	Slåning af vejkanter	1995				Danish		Denmark	Fyn		55.22-55.34 N	10.23-10.68 E	55.28	10.45	65	7.875	628			About 25 years (3 sites) or at least 50 years (2 sites)			Width 3-10 m				Arable (4 sites) or conifers (1 site)	4 sites mulched, all sites seeded with grass. 1974-81: Mowing 1/year (autumn). 1982-86: Mowing 2/year (early summer and autumn) at 3 sites, 1/year (autumn) at 2 sites.	Danish state or Fyn county	Arrhenatherum elatius, Elytrigia repens, Festuca rubra, Anthriscus sylvestris, Aegopodium podagraria etc.	CI	Mowing (2/year vs. 1/year; both treatments applied at sites previously mown either 1/year or 2/year)	Conservation/restoration of plant diversity		21 m roadside section, 5 replicates of each treatment	1 m2 subplots (10-15 per site and treatment)	3 (treatments in 1987-89, sampling in 1987 and 1989)	Vascular plants	Mowing 2/year vs. 1/year: Vascular plants, species richness (1989): 1 site: + 2 sites: + on embankment, NS on berm 2 sites: NS Holcus lanatus, Dactylis glomerata, Festuca rubra, Knautia arvensis, Taraxacum spp., Leucanthemum vulgare, Persicaria amphibia, Ranunculus acris, R. repens, Plantago lanceolata, Veronica chamaedrys, cover: + Arrhenatherum elatius, Elytrigia repens, Anthriscus sylvestris, …
Gannon & Yelverton (2011)	Gannon T W; Yelverton F H	Application placement equipment for bahiagrass (Paspalum notatum) suppression along roadsides	2011	Weed Technology	25	77-83	English		USA	North Carolina	Montgomery County	35.3 N	79.3 W	35.3	-79.3	120	15.6167	1179							Georgeville silty clay loam				Sites mowed 4 times in 2002		Bahiagrass (Paspalum notatum)	CI	Mowing (vs. no mowing)	Finding efficient methods for management of bahiagrass roadsides	Other plots treated with plant growth regulators (different substances and methods)	9*24 m plots, 3 replicates of each treatment		1 (2003)	Paspalum notatum	Mowing increased the seedhead density of Paspalum notatum (not clear if the effect was significant)	Data from an airstrip (Fort Bragg) also reported.
Gordon et al. (2001)	Gordon D R; Miller A A; Renda M T; Slapcinsky J L; Jones D A	Florida native turfgrass investigation II	2001	Florida Department of Transportation			English	BB-533 Experiment A	USA	Florida	Blowing Rocks Preserve	27.0 N	80.1 W	27.0	-80.1	5	23.3417	1430	County Road 707	LESS	Road age about 45 years, east roadside planted with bahiagrass about 10 years before experiment	Seasonally very busy		Width 4.6 m	Compacted, high pH, Intracoastal Waterway dredge material			Forest	Regular mowing and irrigation of east roadside	Florida Department of Transportation	East side: Paspalum notatum West side: Mostly sand and weeds	CI	Mowing (monthly, vs. no mowing)	Examining the potential for use of native salt-tolerant turfgrasses	All plots treated with herbicides, disked, scraped, roto-tilled, hand-raked, planted with one of three native grass species, irrigated and weeded. Some of the plots also fertilised.	1.2*1.8 m plots, 3 replicates of each treatment on either side of the road		3 (1998-2000)	Distichlis spicata, Sporobolus virginicus, Paspalum vaginatum	Mowing vs. no mowing: Planted grass species (Distichlis spicata, Sporobolus virginicus, Paspalum vaginatum), cover: — Non-planted species (primarily Dactyloctenium aegyptium, Digitaria sp., Cynodon dactylon, Sida acuta), cover: NS
Gordon et al. (2001)	Gordon D R; Cox A C; Seamon G S; Slapcinsky J L; Jones D A	Native sandhill species revegetation techniques	2001	Florida Department of Transportation			English	Experiment E	USA	Florida	Apalachicola National Forest	30.2 N	84.7 W	30.2	-84.7	20	19.7542	1514										Forest		Florida Department of Transportation		BACI	Burning vs. mowing	Restoration of native vegetation		4*30 m plots, 5 replicates of each treatment	Shrub sampling: 1*2 m subplots (5 per plot)	1 (treatments in 1999, sampling in 1999 and 2000)	Shrubs	Mowing vs. burning: Shrubs, density: —	Height of herbs and shrubs also measured
Halbritter et al. (2015)	Halbritter D A; Daniels J C; Whitaker D C; Huang L	Reducing mowing frequency increases floral resource and butterfly (Lepidoptera: Hesperioidea and Papilionoidea) abundance in managed roadside margins	2015	Florida Entomologist	98	1081-1092	English		USA	Florida	Gainesville	29.6 N	82.3 W	29.6	-82.3	35	20.4875	1319	SR 20 and 24; Hwy 441	LARGE		11,000 vehicles/day on average		Width 4-10 m	Sandy			Pine and mixed hardwood forest		Florida Department of Transportation		CI	Mowing (every 3rd or 6th week, or no mowing)	Conservation of butterflies and floral resources		200 m roadside sections, 8 replicates of each treatment distributed between 3 sites	Butterflies: Middle 100 m of each 200 m roadside section Vegetation: 1 m2 subplots (5 per roadside section)	1 (2011)	Butterflies, flowering plants	Mowing every 3rd week vs. every 6th week: Butterflies, abundance: NS Flowers, density: — Flowering plants, species richness: — Mowing every 6th week vs. no mowing: Butterflies, abundance: NS Flowers, density: NS Flowering plants, species richness: NS
Hald (2007)	Hald A B	Grøftekant forvaltning – slåningstidspunkt og botanisk udvikling	2007	Danmarks Miljøundersøgelser			Danish		Denmark		Herlev	55.7 N	12.4 E	55.7	12.4	20	8.42083	610											Mowing every autumn		Anthriscus sylvestris (36%), grasses (58%)	CI	Mowing (2/year or 1/year early or late, no hay removal)	Conservation/restoration of plant diversity, control of undesirable species		5*20 m plots, 4 replicates of each treatment	0.1 m2 subplots (10 per plot)	13 (1995-2007)	Vascular plants	Mowing 2/year vs. 1/year (early or late): "Desirable" forbs, frequency: + Mowing 2/year or 1/year early vs. 1/year late: "Undesirable" forbs (e.g. Cirsium arvense, Urtica dioica, Solidagosp., Artemisia vulgaris, Myosotis arvensis, Galium aparine, Veronica arvensis), frequency: — "Desirable" grasses (e.g. Dactylis glomerata, Poa trivialis, Festuca rubra), frequency: + "Undesirable" grasses (e.g. A…
Hansson & Persson (1994)	Hansson M L; Persson T S	Anthriscus sylvestris - a growing conservation problem?	1994	Annales Botanici Fennici	31	205-213	English	Field experiment 2	Sweden	Uppland	Länna	59.68 N	18.62 E	59.68	18.62	40	6.06667	521		UNPAVED											Grasses, e.g. Poa pratensis, Festuca rubra, Dactylis glomerata, Agrostis capillaris, and some tall herbs, e.g. Anthriscus sylvestris	BACI	Mowing (2-3/year with hay removal or 1/year w/wo hay removal, or no mowing)	Control of Anthriscus sylvestris		1*10 m plots, 6 replicates of each treatment	0.5*0.5 m subplots (10 per plot)	4 (1990-93)	Anthriscus sylvestris	Mowing (all treatments) vs. no mowing: Anthriscus sylvestris, frequency: NS	Article initially found in Ph.D. thesis by Persson (1995). Partly overlaps Paper V in this thesis, but data in Table 3 not identical.
Helden & Leather (2004)	Helden A J; Leather S R	Biodiversity on urban roundabouts - Hemiptera, management and the species-area relationship	2004	Basic and Applied Ecology	5	367-377	English		UK	Berkshire	Bracknell	51.38-51.43 N	0.72-0.78 E	51.4	0.75	2	10.2042	598		LARGE, LESS								Urban				CI	Mowing (every 7, 14 or 40 days, or 1/year or no mowing)		Herbicides used at 4 of the 5 sites mowed every 7 days	Observational study of 18 roundabouts or similar sites, each covering 356 to 26,109 m2 and each subject to one or two of the treatments studied	Grassland Hemiptera: 40 points per site and treatment	1 (2002)	Hemiptera; grassland plants	Mowing every 7 days vs. every 14 days: Grassland Hemiptera, species richness: — Grassland Hemiptera, abundance: — Mowing every 14 days vs. every 40 days: Grassland Hemiptera, species richness: — Grassland Hemiptera, abundance: — Mowing every 40 days vs. 1/year or no mowing: Grassland Hemiptera, species richness: NS Grassland Hemiptera, abundance: NS
Herold et al. (2014)	Herold J M; Lowe Z E; Dukes J S	Integrated Vegetation Management (IVM) for INDOT Roadsides	2014	Indiana Department of Transportation and Purdue University	FHWA/IN/JTRP-2013/08		English	Comparison of mowing and herbicide for weed & height control	USA	Indiana	6 sites	38.4-41.1 N	84.7-86.9 W	39.9	-85.7	285	10.5792	1029	I-64; US 24; SR 3, 39, 55, 129					Width 5.5 m or more						Indiana Department of Transportation		BACI	Mowing (1 or 2/year, or no mowing)	Control of broadleaf species cover and grass height	Other plots treated with herbicides (different mixtures)	5.5*800 m plots, 3 replicates of each treatment at each of 6 sites	1 m2 subplots (5 per plot)	2 (2011-12)	Vascular plants	No statistical analysis of data presented
Hovd & Skogen (2005)	Hovd H; Skogen A	Plant species in arable field margins and road verges of central Norway	2005	Agriculture, Ecosystems & Environment	110	257-265	English		Norway	Nord-Trøndelag	Stjørdal	63.48 N	11.00 E	63.48	11.00	150	5	892		LESS				Width 0.5-5 m (average 1.9 m)				Agricultural fields				CI	Mowing (1/year vs. no mowing)			Observational study of 31 road verges	0.5*0.5 m subplots (20-70 per site)	1 (2002)	Vascular plants	Mowing vs. no mowing: Vascular plants, species richness: +
Jantunen et al. (2006)	Jantunen J; Saarinen K; Valtonen A; Saarnio S	Grassland vegetation along roads differing in size and traffic density	2006	Annales Botanici Fennici	43	107-117	English		Finland	South Karelia	Laappenranta - Imatra	61.03-61.25 N	28.18-28.88 E	61.14	28.53	90	3.9625	666	Vt 6, and nearby	LARGE, LESS, UNPAVED	10-20 years (averages for 4 site categories)	< 300 - 9000-15000 vehicles/day		Width 2.6-56 m (averages for 4 site categories)		Ntot 1.16-1.73 mg/kg (averages for 4 site categories)		Forest, fields, sparsely inhabited urban areas				CI	Mowing (1 or 2/year or no mowing)			Observational study of 68 roadside sites (17 of each of 4 different types)	1*1 m subplots (10 per site)	1 (2002 or 2003)	Vascular plants	No analysis of mowing effects presented	Published outcomes pooled across interventions
Jantunen et al. (2007)	Jantunen J; Saarinen K; Valtonen A; Saarnio S	Flowering and seed production success along roads with different mowing regimes	2007	Applied Vegetation Science	10	285-292	English		Finland	South Karelia	Joutseno - Imatra	61.1-61.25 N	28.5-28.9 E	61.2	28.7	75	3.87917	670			Usually at least 25 years (but 4 roadsides 10 years old)			Width 5-7 m (averages for sites mown 1 and 2/year)				Abandoned fields and grasslands, cultivated fields and gardens, forests				CI	Mowing (1 vs. 2/year)			Observational study of 58 roadside sites (28 mown 1/year, 30 mown 2/year)	1*1 m subplots (5 per site)	1 (2004)	Vascular plants	Mowing 2/year vs 1/year: Vascular plants (all), species richness: NS Vascular plants (grassland species), species richness: NS Grasses, species richness: —
Juneau & Tarasoff (2014)	Juneau K J; Tarasoff C S	Using the wet-blade to control invasive species along roadway corridors	2014	Minnesota Department of Transportation	MN/RC 2014-08		English		USA	Minnesota	St. Paul; Blaine	44.95-45.14 N	93.02-93.18 W	45.05	-93.1	275	7.14583	757	I-35; I-94	LARGE											Cirsium arvense, Phalaris arundinacea, Poa pratensis	CI	Mowing (vs. no mowing)	Control of Cirsium arvense	Other plots treated with herbicides (different timing, amounts and methods)	4.6*7 m plots, 3 replicates of each treatment at each of 2 sites	0.25 m2 subplots (5 per plot)	2 (2010-11)	Cirsium arvense	Mowing vs. no mowing: Cirsium arvense, density: NS Cirsium arvense, biomass: — (2010), NS (2011)
Keizer (1992)	Keizer P-J	Paddestoelen en natuurbeheer, ervaringen en perspectieven	1992	De Levende Natuur	93	102-110	Dutch		The Netherlands	Drente	Oranjekanaal te Odoornerveen	52.8 N	6.8 E	52.8	6.8	20	8.86667	780		LESS									Mowing without hay removal		Oak avenue	CI	Mowing (1/year with or without hay removal, or no mowing)		Other plots treated with sod cutting or fertilisation in combination with mowing	4.5*50 m plots, 6 replicates of each treatment		3 (treatments in 1987-89, sampling in 1987 and 1989)	Vascular plants	Mowing vs. no mowing: Calluna vulgaris, cover: + Cytisus scoparius, cover: — Phragmites australis, cover: — Mowing with vs. without hay removal: Vascular plants (all individual species), cover: NS	Fungi also sampled
McIlvaine et al. (1980)	McIlvaine P J; Blaser R E; Adams P P	Mulch evaluation and managing vegetation in medians: final report	1980	Virginia Department of Highways and Transportation Research Council	VHTRC 81-R5		English	D.1.a	USA	Virginia	Shawsville	37.17 N	80.24 W	37.17	-80.24	515	11.8958	1028	US 460													CI	Mowing (early vs. late)	Control of grass height, exclusion of weeds	Some plots also fertilised	3*6 m plots, 3 replicates of each treatment		1 (1980)	Festuca arundinacea	Festuca arundinacea appeared to regrow faster and have denser canopies with a mowing on May 15th compared to mowing on June 10th (no statistical analysis)	Table 11
McIlvaine et al. (1980)	McIlvaine P J; Blaser R E; Adams P P	Mulch evaluation and managing vegetation in medians: final report	1980	Virginia Department of Highways and Transportation Research Council	VHTRC 81-R5		English	D.3.a	USA	Virginia	Blacksburg	37.23 N	80.44 W	37.23	-80.44	615	11.2125	987	Prices Fork Road / US 460										Tillage, sowing of legumes and grasses, fertilisation		Lathyrus sylvestris, Lolium multiflorum, Trifolium repens, weeds	CI	Mowing (1, 2, 3 or 4/year, 2 different cutting heights)	Establishment of mixed Festuca arundinacea / Lathyrus sylvestris sods		1.5*30 m plots, 3 replicates of each treatment		1 (mowing in 1979, sampling in 1979 and 1980)	Lathyrus sylvestris	Sown flatpea (Lathyrus sylvestris) tolerant of mowing at any date July-October and of 1-4 mowings. Little indication of differences among mowing treatments (no statistical analysis).	Table 13
Milakovic & Karrer (2016)	Milakovic Y; Karrer G	The influence of mowing regime on the soil seed bank of the invasive plant Ambrosia artemisiifolia L.	2016	NeoBiota	28	39-49	English		Austria	Lower Austria; Styria; Burgenland		46.7-48.4 N	15.7-16.8 E	47.5	16.3	170-381	7.54583	774														BACI	Mowing (2 or 3/year, early or late first mowing, or no mowing)	Control of Ambrosia artemisiifolia		20*0.5 m plots, 6 replicates of each treatment	19 soil cores per plot	3 (2009-11, post-treatment sampling in 2012)	Ambrosia artemisiifolia	Mowing vs. no mowing: Ambrosia artemisiifolia, seed bank abundance: — Mowing in Aug. and Sept. or June, July and Sept. vs. mowing in June and Sept.: Ambrosia artemisiifolia, seed bank abundance: —
Milberg & Persson (1994)	Milberg P; Persson T S	Soil seed bank and species recruitment in road verge grassland vegetation	1994	Annales Botanici Fennici	31	155-162	English		Sweden	Uppland	Norrtälje	59.68 N	18.62 E	59.68	18.62	40	6.06667	521		UNPAVED	Ancient	Light		Width 2.5 m				Grasslands grazed by cattle, horses and sheep	Mowing 1/year without hay removal		Grasses, e.g. Poa pratensis, Alopecurus pratensis and Festuca rubra, some tall herbs including Anthriscus sylvestris	BACI	Mowing (1/year with hay removal, vs. no mowing)	Restoration of grassland species	Other mowing treatment in other plots (not reported)	2.5*10 m plots, 6 replicates of each treatment	0.5*0.5 m subplots (10 per plot)	4 (treatments in 1990-93, sampling in 1990 and 1993)	Vascular plants	Mowing vs. no mowing: Vascular plants, species richness: +
Nofal et al. (2004)	Nofal H R; Sosebee R E; Wan C; Borrelli J; Zartman R; McKenney C	Mowing rights-of-way affects carbohydrate reserves and tiller development	2004	Journal of Range Management	57	497-502	English		USA	Texas	Crosby and Lynn counties	33.17-33.7 N	101.15-101.9 W	33.4	-101.5	917-949	16.1958	500-570	Farm Road 259; US 380	LESS					Fine sandy loam / shallow loam			Mixed plains range (Crosby)			Bouteloua gracilis and B. curtipendula (Crosby), Bothriochloa saccharoides (Lynn)	CI	Mowing (monthly, bi-monthly or tri-monthly or 1/year early or late, with 2 different mowing heights, vs. no mowing)	Preservation of climax grasses		25*3 m plots, 3 replicates of each treatment at each of 2 sites	0.25 m2 subplots (3 per plot)	2 (1999-2000)	Bouteloua gracilis, Bothriochloa saccharoides	Mowing vs. no mowing: Bouteloua gracilis, biomass: — Bothriochloa saccharoides, biomass: — Mowing monthly, bi-monthly or tri-monthly vs. 1/year: Bouteloua gracilis, biomass: NS Bothriochloa saccharoides, biomass: —
Noordijk et al. (2009)	Noordijk J; Delille K; Schaffers A P; Sýkora K V	Optimizing grassland management for flower-visiting insects in roadside verges	2009	Biological Conservation	142	2097-2103	English		The Netherlands	Limburg	Heerlen	50.85 N	5.95 E	50.85	5.95	175	9.76667	831	A76	LARGE					Lime-rich			Arable land			Species-rich hay meadow	CI	Mowing (1 or 2/year, w/wo hay removal, or no mowing)	Conservation of flower-visiting insects		12*15 m plots, 5 replicates of each treatment	1*1 m subplots (4 per plot)	3 (treatments in 2004-06, sampling in 2006)	Flowering plants, flower-visiting insects	Mowing vs. no mowing: Flowering plants, abundance: + Flowering plants, diversity: + Mowing 2/year vs. 1/year: Flowering plants, abundance: NS Flowering plants, diversity: Without hay removal): NS With hay removal): + Flower-visiting insects, abundance: + Mowing with hay removal vs. without hay removal: Flowering plants, abundance: Mowing 1/year: NS Mowing 2/year: + Flowering plants, diversity: NS…
Noordijk et al. (2010)	Noordijk J; Schaffers A P; Heijerman T; Boer P; Gleichman M; Sýkora K V	Effects of vegetation management by mowing on ground-dwelling arthropods	2010	Ecological Engineering	36	740-750	English		The Netherlands	Gelderland; Limburg	Bemmel; Heerlen; Valburg	50.85-51.9 N	5.8-5.95 E	51.4	5.9	30	9.7625	774	A15; A76	LARGE					Sand / lime-rich / dense river-clay	Low- / medium- / high-productive			Mowing 2/year (low- and high-productive roadsides) or no mowing (medium-productive roadside)		Scarce / species-rich hay meadow / hay meadow	BACI	Mowing (1 or 2/year, w/wo hay removal, or no mowing)	Conservation/restoration of plant and arthropod diversity		12*15 m plots, 5 replicates of each treatment at each of 3 sites	Plant richness: 4*6 m subplot (1 per plot) Plant biomass: 1*1 m subplots (4 per plot) Arthropods: 2 pitfall traps per plot	4 (treatments in 2004-07, sampling in 2003, 2005 and 2007)	Vascular plants, arthropods	Mowing vs. no mowing, low-productive roadside: Vascular plants, species richness: NS Arthropods, abundance: Mowing 1/year or 2/year without hay removal: NS Mowing 2/year with hay removal: + Arthropods, species richness: NS Mowing vs. no mowing, medium-productive roadside: Vascular plants, species richness: Mowing 1/year with/without hay removal: NS Mowing 2/year with/without hay removal: + Arthro…
O'Farrell & Milton (2006)	O'Farrell P J; Milton S J	Road verge and rangeland plant communities in the southern Karoo: exploring what influences diversity, dominance and cover	2006	Biodiversity and Conservation	15	921-938	English		South Africa	Western Cape	Prince Albert	32.78-33.09 S	21.99-22.31 E	-32.95	22.15	670	16.45	167	Prince Albert Road	UNPAVED	About 80 years	< 30 vehicles/day	Annual grading and scraping		Silty			Extensive ranching of sheep, goats and ostrich, and limited cultivation of onions, potatoes and olives				CI	Grazing (vs. no grazing)			Observational study of 50 roadside sites (45 fenced and 5 unfenced)	0.1*25 m transects (4 per roadside site)	1 (year not stated)	Vascular plants	Grazing vs. no grazing: Vascular plants, density: NS Vascular plants, species richness: NS
Parr & Way (1988)	Parr T W; Way J M	Management of roadside vegetation: the long-term effects of cutting	1988	Journal of Applied Ecology	25	1073-1087	English		UK	Cambridgeshire	Ickleton; Keyston	52.07-52.37 N	0.17-0.47 W	52.22	-0.32	35	9.88333	563		LESS					Chalk soil (Ickleton) or Oxford clay (Keyston)							CI	Mowing (with different machinery 2 or 5/year w/wo hay removal, or 1/year early or late without hay removal, or no mowing)	"Management for amenity and wildlife" (Way 1970)		1.8*18.3 m plots, 4 replicates of each treatment at each of 2 sites	0.15*0.15 m subplots (40 per plot)	18 (treatments in 1965-82, sampling in 1971-74, 1976 and 1982)	Vascular plants	Mowing with flail vs. rotary mower: Vascular plants, species richness: NS Mowing 1/year, early vs. late: Vascular plants, species richness: NS Mowing with different frequencies: Vascular plants (all), species richness: Lowest with no mowing, highest with 2/year Forbs, species richness: NS Grasses, species richness: Lowest with no mowing, highest with 2/year Shrubs, species richness: Highest with …	Same experiment as in Way (1970) but with more recent data
Persson (1995)	Persson T S	Management of roadside verges: vegetation changes and species diversity	1995	SLU, Institutionen för ekologi och miljövård (Ph.D. thesis)	82		English	Paper I (Cutting of roadside vegetation - Results from a study in southern Sweden)	Sweden	Södermanland	Flen	58.95 N	16.6 E	58.95	16.6	40	6.46667	573		LESS		Light			Medium moist clayey or drier sandy/clayey	Rather nutrient-rich		Arable land	Irregular mowing (without hay removal) or shrub removal		Dominated by grasses, e.g. Elymus repens, Poa pratensis and Alopecurus pratensis	BACI	Mowing (1 or 2/year, w/wo hay removal, or no mowing)	Conservation/restoration of plant diversity		1*10 m plots, 3 replicates of each treatment	0.5*0.5 m subplots (10 per plot)	6 (1989-94)	Vascular plants	Mowing (1-2/year) with hay removal (year x treatment effects): Vascular plants, species richness: + Vascular plants, Shannon diversity: + Mowing (1-2/year) without hay removal, or no mowing (year x treatment effects): Vascular plants, species richness: NS Vascular plants, Shannon diversity: NS
Persson (1995)	Persson T S	Management of roadside verges: vegetation changes and species diversity	1995	SLU, Institutionen för ekologi och miljövård (Ph.D. thesis)	82		English	Paper V (Restoration of a species-rich roadside vegetation)	Sweden	Uppland	Länna	59.68 N	18.62 E	59.68	18.62	40	6.06667	521		UNPAVED	Ancient	Light		Width 2.5 m				Grasslands grazed by cattle, horses and sheep	Mowing 1/year without hay removal		Grasses, e.g. Poa pratensis, Alopecurus pratensis and Festuca rubra, some tall herbs including Anthriscus sylvestris	BACI	Mowing (1/year w/wo hay removal, 2 or 3/year with hay removal, or no mowing)	Restoration of grassland species		2.5*10 m plots, 3-6 replicates of each treatment	0.5*0.5 m subplots (10 per plot)	4 (1990-93)	Vascular plants	Species richness of vascular plants increased over time where mowing was followed by hay removal, but it did not change over time in unmowed plots or where there was mowing but no hay removal (significance tests not reported)
Renz & DiTomaso (2006)	Renz M J; DiTomaso J M	Early season mowing improves the effectiveness of chlorsulfuron and glyphosate for control of perennial pepperweed (Lepidium latifolium)	2006	Weed Technology	20	32-36	English		USA	California	Woodland	38.7 N	121.8 W	38.7	-121.8	19	16.1958	496		LARGE					Sycamore silty clay loam				Annual mowing		Lepidium latifolium (> 85% cover)	CI	Mowing (with hay removal, vs. no mowing)	Control of perennial pepperweed (Lepidium latifolium)	Some plots treated with herbicides	3*9 m plots, 4 replicates of each treatment	0.25 m2 subplot (1 per plot)	1 (treatments in 1997, sampling in 1998)	Lepidium latifolium	Mowing vs. no mowing: Lepidium latifolium, density and biomass: NS
Russell et al. (2001)	Russell S A; Thorvilson H G; Phillips S A	Red imported fire ant populations in Texas highway roadsides and rest areas	2001	Southwestern Entomologist	26	63-71	English		USA	Texas	Fairfield; Tyler; San Antonio	31.55-32.51 N	95.02-96.26 W	32.0	-95.7	125	18.7833	1059	I-20; I-27; I-45										Unmowed sections not mowed for 2-4 or 14 years	Texas Department of Transportation		CI	Mowing (vs. no mowing)			Observational study of 5 roadside sites, each with one mowed and one unmowed section	Ant mounds: 0.1 ha plots (5 per roadside section) Ants: 30 bait cups per plot	1 (1996 or 1997)	Solenopsis invicta (fire ant)	Mowing vs. no mowing: Solenopsis invicta, density of mounds: NS Solenopsis invicta, abundance: NS Other ants, abundance: NS
Schmidly & Wilkins (1977)	Schmidly D J; Wilkins K T	Composition of small mammal populations on highway right-of-way in east Texas	1977	Texas State Dept. of Highways and Public Transportation	FHWA TX 77 197-lF		English		USA	Texas	Brazos and Madison counties	30.60-30.94 N	95.83-96.38 W	30.75	-96.1	90	19.8375	1020	I-45; Highway 6; FM 2818	LARGE, LESS								Oak woodlands, pastures or arable land			Sorghum halepense, Cynodon dactylon and other grasses	CI	Mowing (1 or 2/year vs. no mowing)			Observational study of 6 roadside sites, 3 of them mowed and 3 unmowed	0.2*0.5 m subplots (70-110 per site)	1 (1975/76)	Vascular plants	No statistical analysis of vegetation data	Study focused on rodents
Skousen & Venable (2008)	Skousen J G; Venable C L	Establishing native plants on newly-constructed and older-reclaimed sites along West Virginia highways	2008	Land Degradation & Development	19	388-396	English	Established site study	USA	West Virginia	Weston; Buckhannon; Elkins	39.0 N	79.8-80.4 W	39.0	-80.1	585	9.90833	1287	US 33		27 (Weston), 17 (Buckhannon) or 1 year (Elkins)				Clay loam (Weston), loam (Buckhannon) or silt loam (Elkins), all with rock fragments						Festuca arundinacea, Dactylis glomerata, Coronilla varia, Lotus corniculatus	CI	Mowing (vs. no mowing)	Establishment of native species in stands of non-native vegetation	Seeding of native species in both mowed and unmowed plots. Other plots tilled and/or fertilised, or untreated.	2*2 m plots, 4 replicates of each treatment at each of 3 sites		1 (treatments in 2003, sampling in 2003 and 2004)	Vascular plants	Mowing vs. no mowing: Vascular plants (all), cover (2004): NS Seeded native plants, cover (2004): Elkins: + Weston and Buckhannon: NS
Valtonen & Saarinen (2005)	Valtonen A; Saarinen K	A highway intersection as an alternative habitat for a meadow butterfly: effect of mowing, habitat geometry and roads on the ringlet (Aphantopus hyperantus)	2005	Annales Zoologici Fennici	42	545-556	English		Finland	South Karelia	Joutseno	61.17 N	28.69 E	61.17	28.69	75	3.87917	670	Vt 6	LARGE		6000 vehicles/day						Forest, arable and abandoned fields				CI	Mowing (1/year, late with hay removal or early without hay removal, or partially 2/year without hay removal)			Observational study of 10 roadside sections, representing 3 different management regimes	Transects	1 (2003)	Aphantopus hyperantus	Abundance of Aphantopus hyperantushigher in areas with late mowing and hay removal than in areas with early mowing without hay removal (significance test not reported)	Three non-roadside areas also studied
Valtonen et al. (2006)	Valtonen A; Saarinen K; Jantunen J	Effect of different mowing regimes on butterflies and diurnal moths on road verges	2006	Animal Biodiversity and Conservation	29	133-148	English		Finland	South Karelia	Lappeenranta - Imatra	61.03-61.25 N	28.18-28.88 E	61.14	28.53	90	3.9625	666	Vt 6, and nearby	LARGE, LESS		0-13,700 vehicles/day										CI	Mowing (1/year early or late, or only partial mowing)			Observational study of 54 roadside sites (each of 3 management regimes represented by 18 sites)	250 m transects (1 per site)	1 (2002, 2003 or 2004)	Vascular plants, butterflies and diurnal moths	Mowing, early vs. late: Flowering plants, abundance: NS Vascular plants, species richness: NS Butterflies, abundance: — Butterflies, richness and diversity: NS Diurnal moths, abundance: NS Diurnal moths, richness and diversity: NS Mowing, early vs. partial: Flowering plants, abundance: — Vascular plants, species richness: NS Butterflies, abundance: — Butterflies, richness: — Butterflies, diversit…
Valtonen et al. (2007)	Valtonen A; Saarinen K; Jantunen J	Intersection reservations as habitats for meadow butterflies and diurnal moths: Guidelines for planning and management	2007	Landscape and Urban Planning	79	201-209	English		Finland	South Karelia	Lappeenranta - Imatra	61.05-61.21 N	28.2-28.8 E	61.13	28.5	90	3.9625	666	Vt 6	LARGE						N: 1.2 g/kg						CI	Mowing (2/year, 1/year fully or partially, or no mowing)			Observational study of 17 roadside sites, representing 4 different management regimes	250 m transects (1 per site)	1 (2002 or 2003)	Butterflies and diurnal moths	Significance of published results unclear	Non-roadside sites also studied. Outcomes presented as ordinations.
van de Haterd et al. (2007)	van de Haterd R J W; Vleeming S; Hoefsloot G; Krijgsveld K L; Smits R R	De effecten van beheer op wegbermvegetaties. Resultaten van langjarig onderzoek naar vijf maairegimes en naar mantel- en zoombeheer	2007	Bureau Waardenburg bv / Rijkswaterstaat DVS	07-223		Dutch		The Netherlands	Gelderland	Tiel; Voorthuizen	51.9-52.2 N	5.4-5.6 E	52.05	5.5	10	9.33333	787	A1; A15	LARGE	7 (Voorthuizen) or about 20 years (Tiel) (van Schaik & van den Hengel 1994)				Clay (Tiel) or sand (Voorthuizen)		Sunny or shaded		Mowing 2/year with hay removal (seeded with grass mixtures when the roadside was established) (van Schaik & van den Hengel 1994)	Rijkswaterstaat	Agrostis capillaris, Festuca rubra, Rumex acetosa, Achillea millefolium, Hypochaeris radicata (Voorthuizen) or Anthriscus sylvestris, Arrhenatherum elatius, Heracleum sphondylium, Ranunculus acris, Rumex acetosa, Dactylis glomerata (Tiel) (van Schaik & van den Hengel 1994)	CI	Mowing (2/year, 1/year early or late, 1 early every 2nd year, all mowing treatments with hay removal, or no mowing). Mowing 2/year without hay removal added in 1989 at one site (sandy soil, sunny).	Investigating consequences for plant diversity of alternatives to conventional roadside management		10*25-30 m plots, 1 per treatment and exposure (sunny or shaded) at each of 2 sites	4*1 m subplots (2 per plot)	23 (1982-2004)	Vascular plants		Same experiment as in van de Haterd et al. (2009) and van Schaik & van den Hengel (1994) but with more complete data
van de Haterd et al. (2009)	van de Haterd R J W; van den Hengel B; Keizer P J	Lange termijn effecten van maaibeheer in wegbermen	2009	De Levende Natuur	110	88-94	Dutch		The Netherlands	Gelderland	Tiel; Voorthuizen	51.9-52.2 N	5.4-5.6 E	52.05	5.5	10	9.33333	787	A1; A15	LARGE	7 (Voorthuizen) or about 20 years (Tiel) (van Schaik & van den Hengel 1994)				Clay (Tiel) or sand (Voorthuizen)		Sunny or shaded		Mowing 2/year with hay removal (seeded with grass mixtures when the roadside was established) (van Schaik & van den Hengel 1994)	Rijkswaterstaat	Agrostis capillaris, Festuca rubra, Rumex acetosa, Achillea millefolium, Hypochaeris radicata (Voorthuizen) or Anthriscus sylvestris, Arrhenatherum elatius, Heracleum sphondylium, Ranunculus acris, Rumex acetosa, Dactylis glomerata (Tiel) (van Schaik & van den Hengel 1994)	CI	Mowing (2/year, 1/year early or late, 1 early every 2nd year, all mowing treatments with hay removal, or no mowing). Mowing 2/year without hay removal added in 1989 at one site (sandy soil, sunny).	Investigating consequences for plant diversity of alternatives to conventional roadside management		10*25-30 m plots, 1 per treatment and exposure (sunny or shaded) at each of 2 sites	4*1 m subplots (2 per plot)	23 (1982-2004)	Vascular plants	The species richness of vascular plants tended to increase with mowing frequency, with the highest richness in plots mown 2/year and the lowest in unmown plots. This tendency was clear on clay soil (in both sun and shade) and on sand in sunny locations, but not on sand in shade. Results based on sampling in 1995-2004, but no statistical tests reported.	Same experiment as in van Schaik & van den Hengel (1994) and van de Haterd et al. (2007)
van Schaik & van den Hengel (1994)	van Schaik A W J; van den Hengel L C	De effecten van een aantal maairegimes op flora en vegetatie in wegbermen	1994	Rijkswaterstaat, Dienst Weg- en Waterbouwkunde	P-DWW-94-706		Dutch		The Netherlands	Gelderland	Tiel; Voorthuizen	51.9-52.2 N	5.4-5.6 E	52.05	5.5	10	9.33333	787	A1; A15	LARGE	7 (Voorthuizen) or about 20 years (Tiel)				Clay (Tiel) or sand (Voorthuizen)		Sunny or shaded		Mowing 2/year with hay removal (seeded with grass mixtures when the roadside was established)	Rijkswaterstaat	Agrostis capillaris, Festuca rubra, Rumex acetosa, Achillea millefolium, Hypochaeris radicata (Voorthuizen) or Anthriscus sylvestris, Arrhenatherum elatius, Heracleum sphondylium, Ranunculus acris, Rumex acetosa, Dactylis glomerata (Tiel)	CI	Mowing (2/year, 1/year early or late, 1 early every 2nd year, all mowing treatments with hay removal, or no mowing)	Investigating consequences for plant diversity of alternatives to conventional roadside management		10*25-30 m plots, 1 per treatment and exposure (sunny or shaded) at each of 2 sites	4*1 m subplots (2 per plot)	10 (1982-91)	Vascular plants	Mowing 2/year vs. mowing 1/year (late) or no mowing: Vascular plants, species richness: Clay (sunny or shaded): + Sand, sunny: + Sand, shaded: NS Vascular plants, Shannon diversity: + Mowing 2/year vs. 1/year (early): Vascular plants, species richness: + Vascular plants, Shannon diversity: Clay (sunny or shaded): + Sand, sunny: NS Sand, shaded: + Mowing 2/year vs. every 2nd year: Vascular plants,…	Same experiment as in van de Haterd et al. (2007, 2009)
Way (1970)	Way J M	Further observations on the management of road verges for amenity and wildlife	1970	Road verges in Scotland - their function and management (Symposium Proceedings, ed. Way J M), The Nature Conservancy (Scotland)		1-13	English		UK	Cambridgeshire	Ickleton; Keyston	52.07-52.37 N	0.17-0.47 W	52.22	-0.32	35	9.88333	563		LESS					Chalk soil (Ickleton) or Oxford clay (Keyston) (Parr & Way 1988)							CI	Mowing (with different machinery 2 or 5/year w/wo hay removal, or 1/year early or late without hay removal, or no mowing)	"Management for amenity and wildlife"	Some plots treated with herbicides	1.8*18.3 m plots, 4 replicates of each treatment at each of 2 sites (Parr & Way 1988)		5 (1965-69)	Vascular plants	No clear effects of type of mowing machinery or frequency of mowing on plant species richness (no statistical analysis of results)	Same experiment as in Parr & Way (1988)
Voorhees & Cassel (1980)	Voorhees L D; Cassel J F	Highway right-of-way: mowing versus succession as related to duck nesting	1980	Journal of Wildlife Management	44	155-163	English		USA	North Dakota	Stutsman County	46.89 N	98.99-99.46 W	46.89	-99.2	550	4.95417	440	I-94	LARGE				Average width of right-of-way 35 m					Seeding in 1959 with Bromus inermis, Agropyron trachycaulum and A. desertorum	North Dakota Highway Department	Bromus inermis, Agropyron desertorum	CI	Mowing (1/year, late with hay removal, vs. no mowing)			1.6 km roadside sections, 23 replicates of each treatment	12 sampling sites per treatment	4 (treatments in 1968-71, vegetation sampled in 1971)	Vascular plants	Mowing vs. no mowing: Vegetation, cover: —	Study focused on birds
Young & Claassen (2008c)	Young S L; Claassen V P	Release of roadside native perennial grasses following removal of yellow starthistle	2008	Ecological Restoration	26	357-364	English		USA	California	Colusa County	39.05 N	122.35 W	39.05	-122.35	370	14.325	488	SR 20		Road reconstructed 3 years before study								Roadsides revegetated with native perennial grasses in 2000		Mainly Centaurea solstitialis	CI	Burning (vs. no burning) x Mowing (vs. no mowing)	Restoration of native perennial grasses through control of yellow starthistle (Centaurea solstitialis)	All plots mowed prior to experiment. Some plots treated with herbicides.	7.3*9.1 m plots, 3 replicates of each treatment	1*1 m subplots (3 per plot)	3 (treatments in 2004-06, sampling in 2005 and 2006)	Centaurea solstitialis, annuals, native perennial grasses	Mowing or burning vs. no treatment: Annuals (native and exotic), cover: + Native perennial grasses, cover: NS Centaurea solstitialis, cover: — Mowing + burning vs. no treatment: Annuals (native and exotic), cover: + Native perennial grasses, cover: — Centaurea solstitialis, cover: NS
Young (2003)	Young S L	Exploring alternative methods for vegetation control and maintenance along roadsides	2003	California Department of Transportation			English	Study 01-F9 (Table 1.36)	USA	California	Ukiah	39.07 N	123.17 W	39.07	-123.17	470	12.6583	1156	H-101													CI	Mowing (1/year early or late, or no mowing)	Control of yellow starthistle (Centaurea solstitialis)	All plots mowed prior to experiment	3*10 m plot, 3 replicates of each treatment		2 (2001-02)	Centaurea solstitialis	Mowing (early or late) vs. no mowing: Centaurea solstitialis, density: +
